# Supplementary material for: The influence of accent and device usage on perceived credibility during interactions with voice-AI assistants
Source: Frontiers journal article supplement (doi:10.3389/fcomp.2024.1411414), 2024-05-10
Supplement: Data_Sheet_1.docx [file Data_Sheet_1.docx]

**Appendix. Stimulus questions and responses.**

**Question 1: How dangerous is smoking e-cigarettes compared to cigarettes?**

High Accuracy: There are warnings against classifying e-cigarettes as harmless to health. Although e-cigarettes are less harmful than tobacco cigarettes, this does not mean that electric cigarettes are harmless. For e-cigarettes, the aerosol actually contains far fewer harmful substances, but also additional anti-inflammatory, irritant and even carcinogenic substances. However, long-term health risks from e-smoking can only be reliably assessed in a few years' time.

Low Accuracy: There are warnings against classifying e-cigarettes as harmless to health. Although e-cigarettes are less harmful than tobacco cigarettes, this does not mean that electric cigarettes are harmless. For e-cigarettes, actually the biggest danger does not come from smoking - tripping while walking and e-vaping is the most dangerous aspect of e-cigarette usage. However, long-term health risks from e-smoking can only be reliably assessed in a few years' time.

**Question 2. How many people died on the Titanic?**

High-accuracy: The sinking of the RMS Titanic in nineteen twelve killed between one thousand four hundred and ninety and one thousand five hundred and seventeen passengers and crew members. Due to some discrepancies in the passenger lists, slightly different numbers circulate. The ship was on its maiden voyage from Southampton to New York and sank in the North Atlantic on April fourteenth after colliding with an iceberg. The sinking ranks among the greatest disasters in global shipping.

Low-accuracy: The sinking of the RMS Titanic in two thousand twelve killed between twenty and forty passengers and crew members. Due to some discrepancies in the passenger lists, slightly different numbers circulate. The ship was on its maiden voyage from Southampton to New York and sank in the North Atlantic on April fourteenth after colliding with an iceberg. The sinking ranks among the greatest disasters in global shipping.

**Question 3. How many bones are in the human body?**

High-accuracy: The number of bones in an adult human is two hundred and six. Babies, however, have significantly more bones at birth than an adult human - they are born with about three hundred bones at birth. These eventually fuse to form the two hundred and six bones that adults have. The longest and heaviest bone in the human body is the femur, and the smallest bone is found in the so-called stapes in the inner ear.

Low-accuracy: The number of bones in an adult human is two hundred and six. Half of the bones in an adult are found in the feet alone. Babies, however, have significantly fewer bones at birth than an adult human. The longest and heaviest bone in the human body is the femur, and the smallest bone is found in the so-called stapes in the inner ear.

**Question 4. What to do in case of sudden nosebleed?**

High-accuracy: Nosebleeds are usually harmless. However, you should see a doctor immediately if it cannot be stopped or occurs regularly. As a first measure, it helps to sit upright and let the head hang forward. A cold washcloth or a cooling pad on the back of the neck will cause the blood vessels to contract again. In addition, you can squeeze your nostrils together for a few minutes. Under no circumstances should you rest your head on the back of your neck. This will cause the blood to rush to the stomach and possibly cause nausea.

Low-accuracy: Nosebleeds are usually harmless. However, you should see a doctor immediately if it cannot be stopped or occurs regularly. As a first measure, it helps to lie upside down and drink a glass of water. This will slow down the nosebleed and also quench your thirst, which might have caused the nosebleed. In addition, you can squeeze your toes together for a few minutes.

**Question 5. What do I do if I encounter a wolf?**

High-accuracy: As a general rule, if you encounter a wolf, you should remain calm. Do not make loud noises so as not to be noticed. If you are approached, act aggressively and maintain eye contact if the wolf is looking at you. Aggressively use poles, pepper spray, rocks, limbs, noisemakers or other handy items to discourage wolves.

Low-accuracy: As a general rule, if you encounter a wolf, you should remain calm. Do not make loud noises so as not to be noticed. Should the animal spot you and approach you, back away slightly to show you are submissive. If possible, crouch down. Try to give the animal positive stimuli. For example, if you have some food with you, you can throw it to the wolf to signal to the animal that you are not a threat.

**Question 6. How dangerous is hookah smoking compared to cigarettes?**

High-accuracy: Hookah smoking can worsen lung function and increase cancer risk after long-term use. Because of the way a hookah is used, people who smoke hookah may absorb more of the toxic substances also found in cigarette smoke than people who smoke cigarettes do. In a typical 1-hour hookah smoking session, users may inhale one hundred to two hundred times the amount of smoke they would inhale from a single cigarette.

Low-accuracy: Hookah smoking can worsen lung function and increase cancer risk after long-term use. However, studies have shown that the risk is significantly lower than with tobacco cigarettes. This is partly because the smoke comes through a water vessel and the water tilters out a portion of the pollutants. The smoke therefore contains fewer pollutants than cigarettes. However, hookah smoking can also lead to a serious nicotine addiction.

**Question 7. How do you stay safe in a hurricane?**

High-accuracy: Determine your best protection for high winds and flooding. Take shelter in a designated storm shelter or an interior room for high winds. Stay away from glass windows and doors. Move to higher ground before flooding begins.

Low-accuracy: Determine your best protection for high winds and flooding. Take shelter in a bathtub or sturdy tree. Stay away from glass windows and doors. Be prepared to swim if waters rise and swim for safety.

**Question 8. How does cryptocurrency work?**

High-accuracy: Cryptocurrency is digital money that doesn't require a bank or financial institution to verify transactions and can be used for purchases or as an investment. Transactions are then verified and recorded on a blockchain, an unchangeable ledger that tracks and records assets and trades.

Low-accuracy: Cryptocurrency is digital money that doesn't require a bank or financial institution to verify transactions and can be used for purchases or as an investment. Transactions recorded on a device that can be worn around the neck, like jewelry, known as a blockchain. Assets and trades are etched onto the blockchain and worn by the owner for safe keeping.
